# Supplementary material for: Convective suppression before and during the United States Northern Great Plains flash drought of 2017
Source: Copernicus journal article supplement (doi:10.5194/hess-22-4155-2018), 2018-08-07
Supplement: Supplementary file 1 [file hess-22-4155-2018-supplement.pdf]

Supplement of Hydrol. Earth Syst. Sci., 22, 4155–4163, 2018  
<https://doi.org/10.5194/hess-22-4155-2018-supplement>  
© Author(s) 2018. This work is distributed under  
the Creative Commons Attribution 4.0 License.

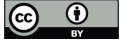

*Supplement of*

## **Convective suppression before and during the United States Northern Great Plains flash drought of 2017**

**Tobias Gerken et al.**

*Correspondence to:* Tobias Gerken ([tobias.gerken@montana.edu](mailto:tobias.gerken@montana.edu))

The copyright of individual parts of the supplement might differ from the CC BY 4.0 License.

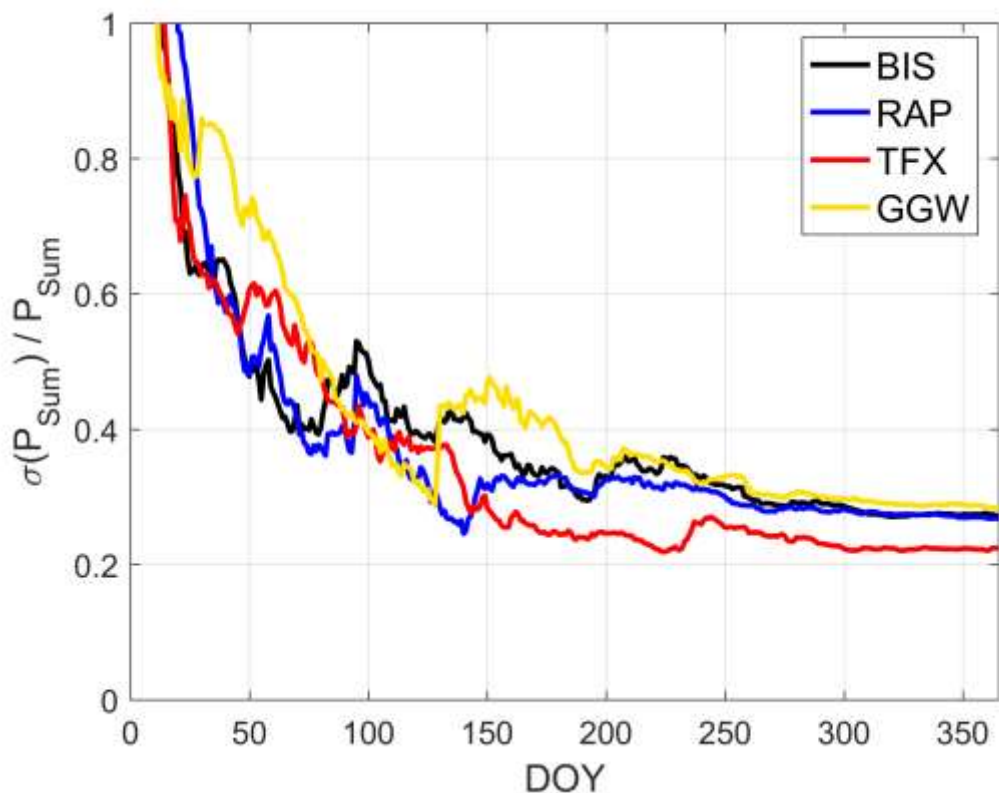

1  
 2 **Figure S1.** Comparison of standard deviation of P-climatology compared to mean cumulative  
 3 annual precipitation (1987-2016) for Bismarck, ND (BIS); Rapid City, SD (RAP); Great Falls,  
 4 MT (TFX); and Glasgow, MT (GGW)

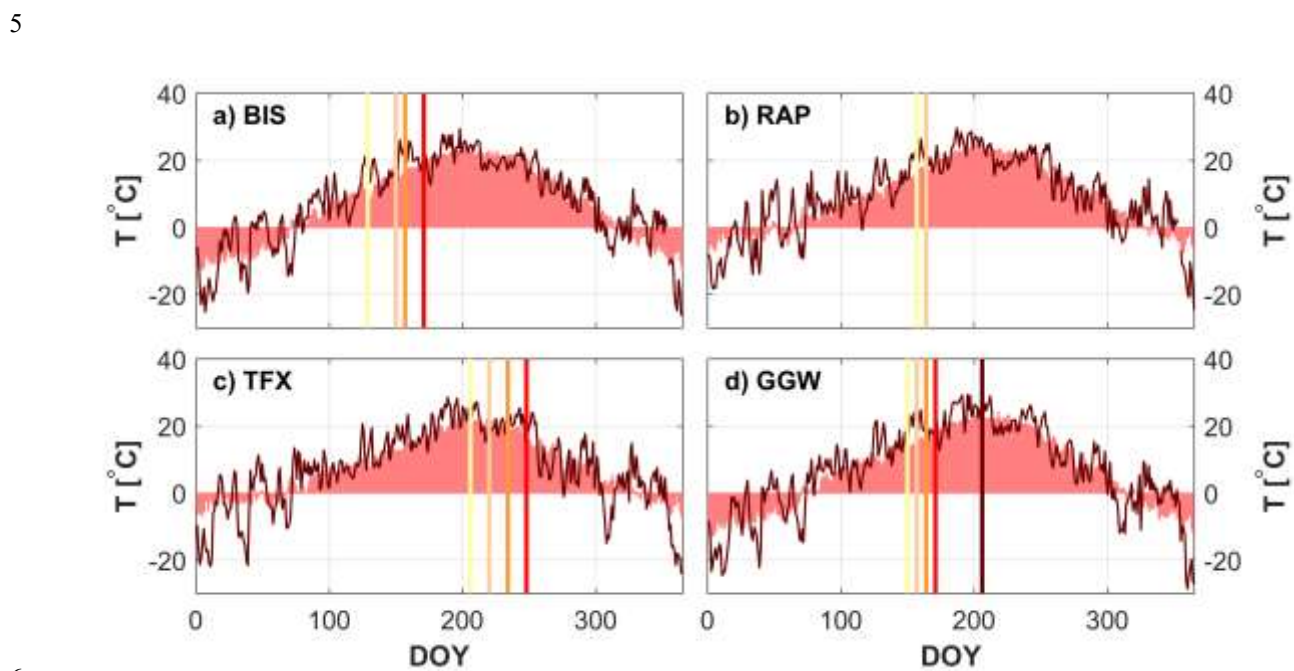

7 **Figure S2.** Air temperature for 2017 (dark red line) compared to 30-year average temperature  
 8 (1987-2016, shaded area) for (a) Bismarck, ND; (b) Rapid City, SD; (c) Great Falls, MT; and (d)  
 9 Glasgow, MT. Vertical lines indicate onset of drought (D0 – yellow to D4 – dark red).

10

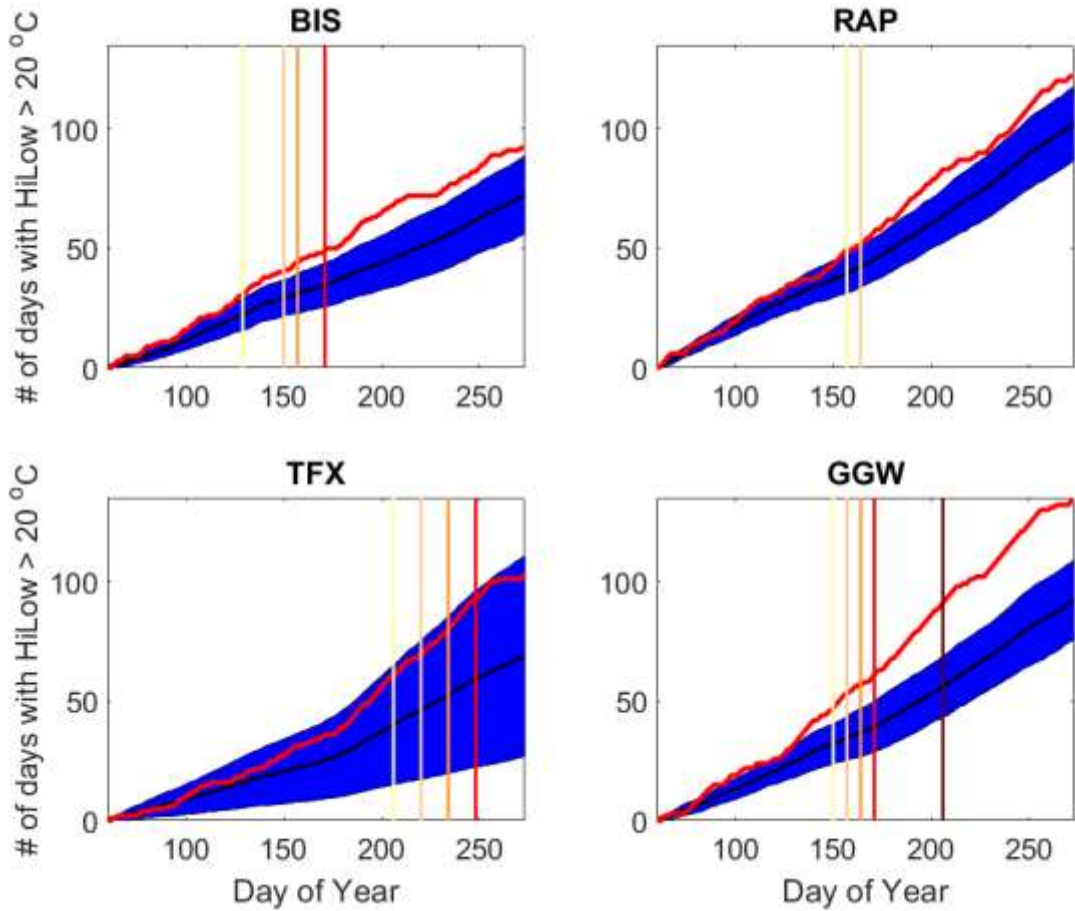

11

12 **Figure S3.** Comparison of cumulative number of days with  $HI_{low} > 20\text{ }^{\circ}\text{C}$  for 2017 (red line) and  
 13 the corresponding 1987-2016 climatology (black line) and its standard deviation (shaded area)  
 14 for (a) Bismarck, ND (BIS); (b) Rapid City, SD (RAP); (c) Great Falls, MT (TFX); and (d)  
 15 Glasgow, MT (GGW). Vertical lines indicate onset of drought (D0 – yellow to D4 – dark red).

16

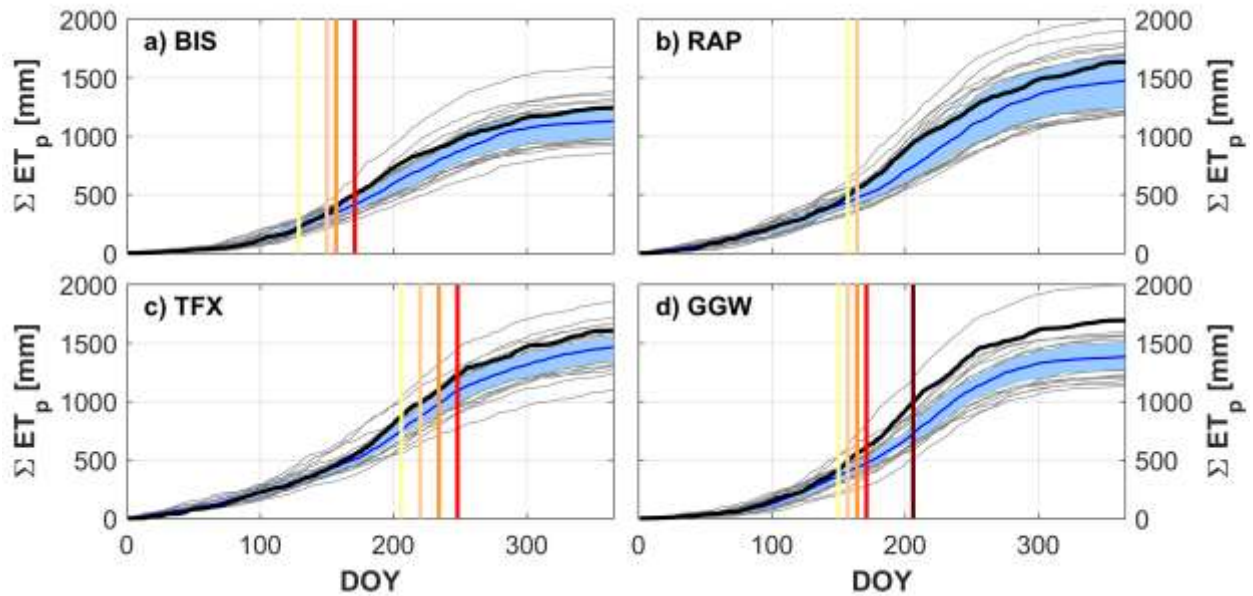

17

18 **Figure S4.** Comparison of cumulative potential evapotranspiration ( $ET_p$ ) estimated from the  
 19 FAO Penman Monteith equation 2017 (black line), climatological interquartile range (shaded  
 20 area), and individual years outside the interquartile range (grey lines) for (a) Bismarck, ND; (b)  
 21 Rapid City, SD; (c) Great Falls, MT; and (d) Glasgow, MT. Vertical lines indicate onset of  
 22 drought (D0 – yellow to D4 – dark red).
